# Supplementary material
Source: MDPI journal article supplement (https://www.mdpi.com/2073-4395/12/1/25)
Supplement: s1 [file s1 › agronomy-1501587-supplementary.pdf]

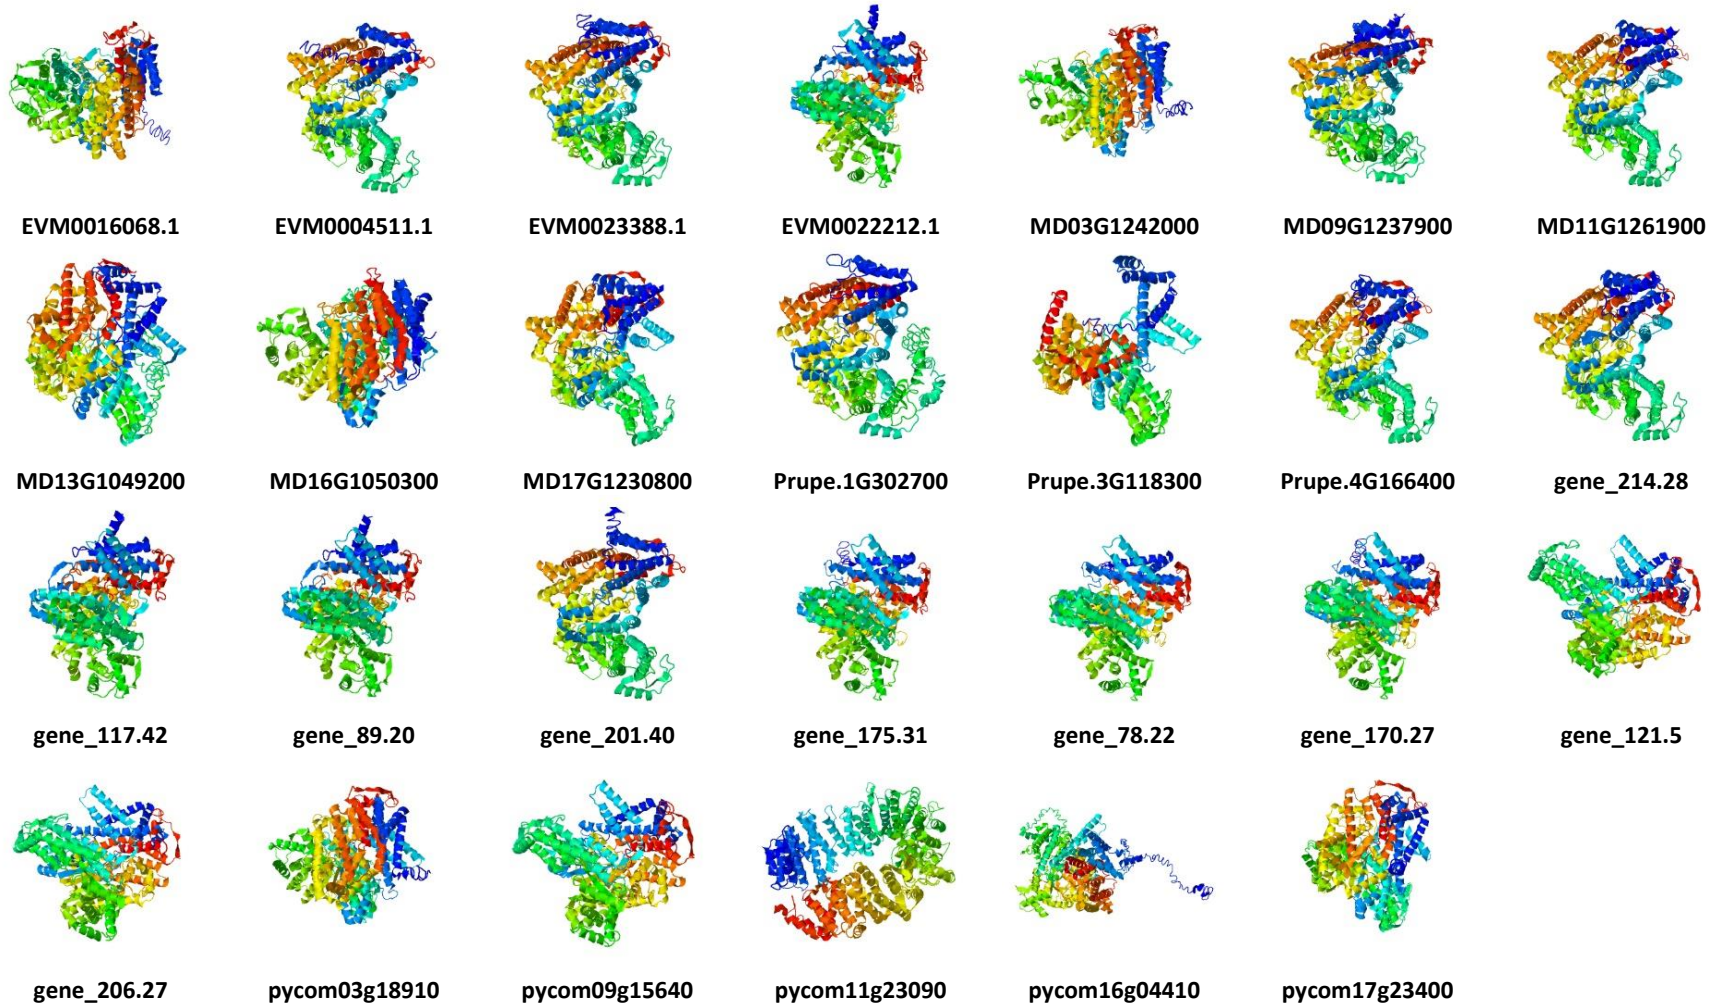

**Figure S1.** The predicted structures (3D) of PEPC proteins in five Rosaceae species. The protein chains are colored as blue at N-terminus and red at the C-terminus. The secondary structures in the model are high-lighted in green (for  $\alpha$ -helices) and yellow (for  $\beta$ -strands).
